# Supplementary figures and images for: CAR-NK Cells Targeting HER1 (EGFR) Show Efficient Anti-Tumor Activity against Head and Neck Squamous Cell Carcinoma (HNSCC)
Source: MDPI journal article supplement (doi:10.3390/cancers15123169), 2023-06-13

Original Images of Western Blot:

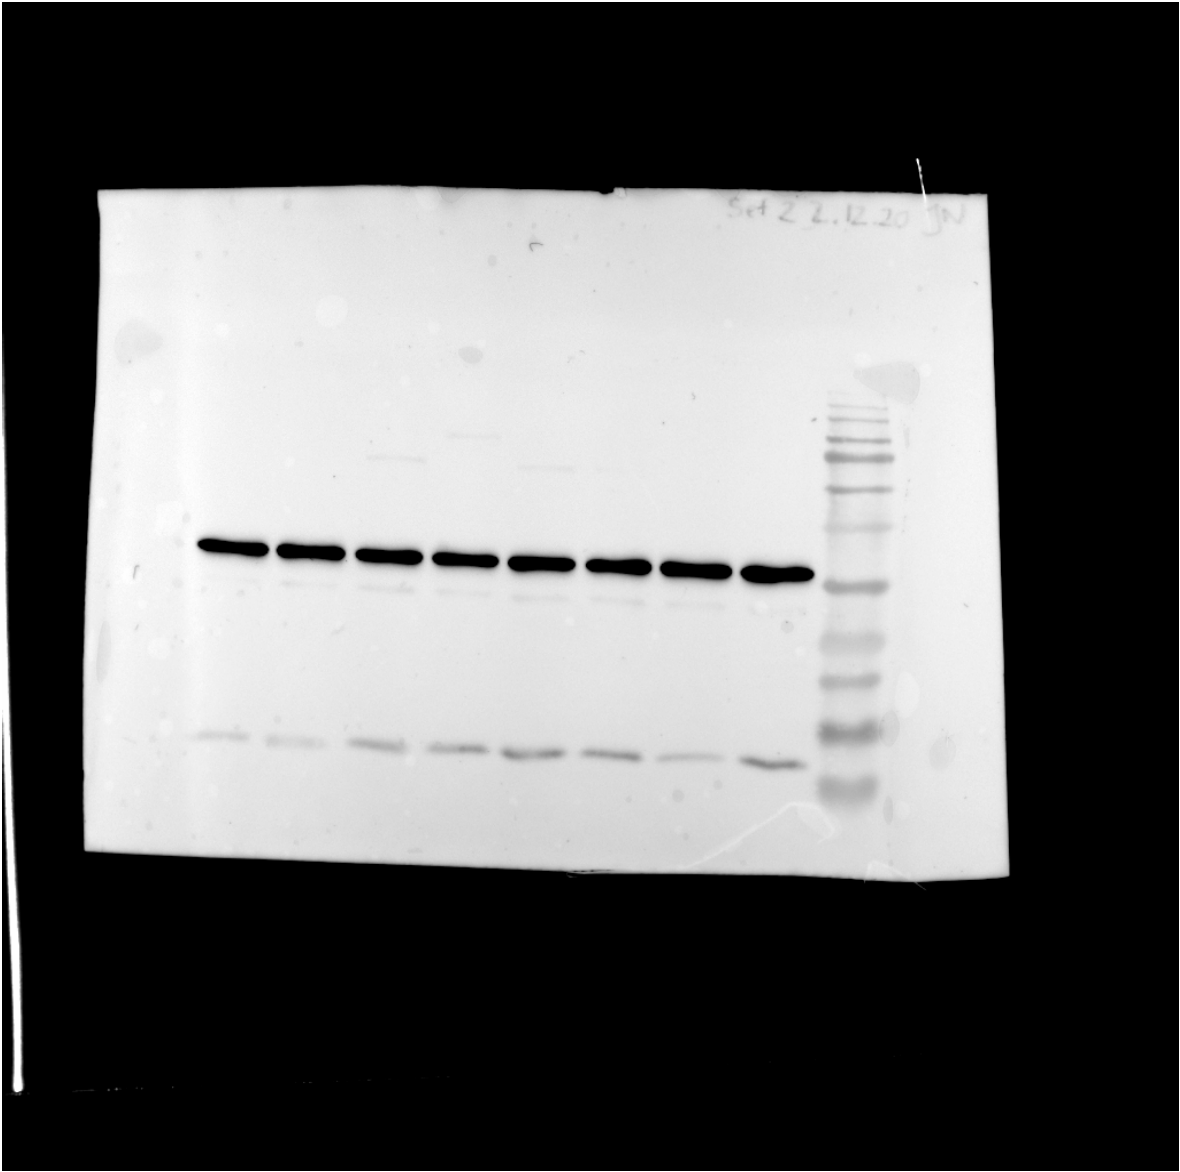

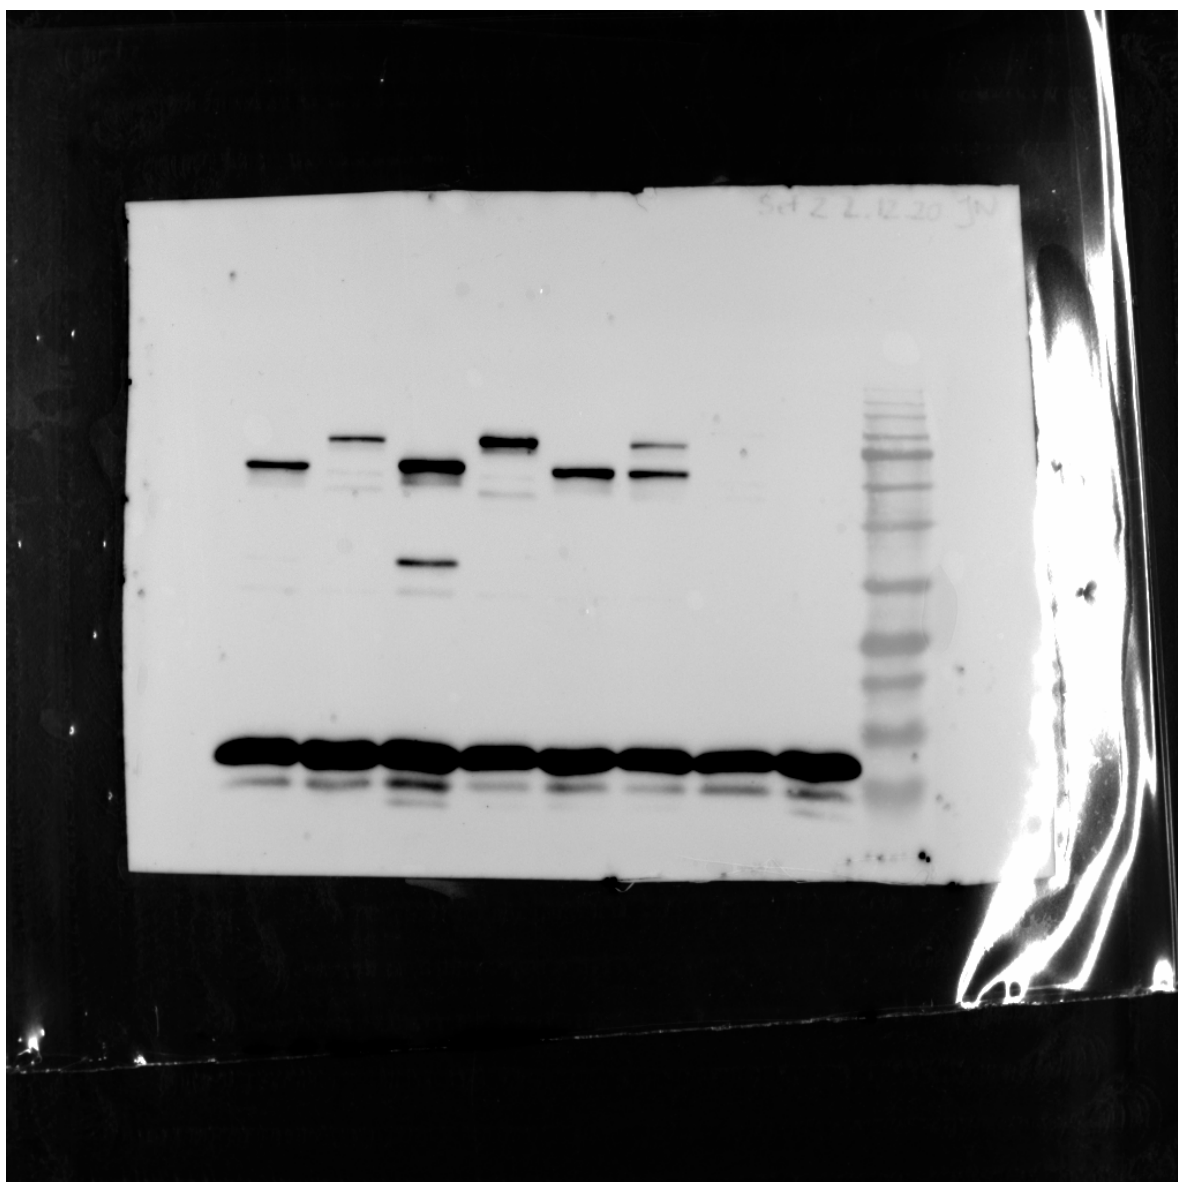

Supplement: s1 [file s1]
